# Supplementary material
Source: PubMed Central journal article supplement (PMC7299870)
Supplement: mmc1.pdf [file mmc1.pdf]

## Supplementary Material

### **A Library of Nucleotide Analogues Terminate RNA Synthesis Catalyzed by Polymerases of Coronaviruses that Cause SARS and COVID-19**

Steffen Jockusch<sup>1,2,#</sup>, Chuanjuan Tao<sup>1,3,#</sup>, Xiaoxu Li<sup>1,3,#</sup>, Thomas K. Anderson<sup>5,6</sup>, Minchen Chien<sup>1,3</sup>, Shiv Kumar<sup>1,3</sup>, James J. Russo<sup>1,3</sup>, Robert N. Kirchdoerfer<sup>5,6,\*</sup>, Jingyue Ju<sup>1,3,4,\*</sup>

<sup>1</sup>Center for Genome Technology and Biomolecular Engineering, Departments of <sup>2</sup>Chemistry, <sup>3</sup>Chemical Engineering and <sup>4</sup>Pharmacology, Columbia University, New York, NY 10027; <sup>5</sup>Department of Biochemistry and <sup>6</sup>Institute of Molecular Virology, University of Wisconsin-Madison, Madison, WI 53706

#SJ, CT and XL contributed equally to this work.

\*To whom correspondence should be addressed: dj222@columbia.edu (JJ); rnkirchdoerf@wisc.edu (RNK)

| Nucleoside                                                                                                                                  | Example Prodrug                                                                                                                                         | Active Triphosphate                                                                                                                                                             |
|---------------------------------------------------------------------------------------------------------------------------------------------|---------------------------------------------------------------------------------------------------------------------------------------------------------|---------------------------------------------------------------------------------------------------------------------------------------------------------------------------------|
| 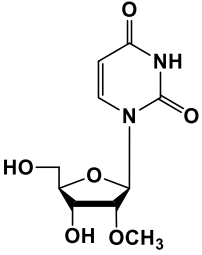 <p data-bbox="207 632 407 663">2'-OMe-Uridine</p>         |  <p data-bbox="532 653 938 684">Phosphoramidate-2'-OMe-Uridine</p>     |  <p data-bbox="1060 632 1458 684">2'-OMe-Uridine-5'-Triphosphate<br/>(2'-OMe-UTP)</p>        |
|  <p data-bbox="175 1010 440 1041">2'-F-2'-Deoxyuridine</p> |  <p data-bbox="565 1031 911 1062">Phosphoramidate-2'-F-2'-dU</p>      |  <p data-bbox="1044 1010 1495 1062">2'-F-2'-Deoxyuridine-5'-Triphosphate<br/>(2'-F-dUTP)</p> |
|  <p data-bbox="207 1409 407 1440">3'-OMe-Uridine</p>     |  <p data-bbox="532 1430 938 1461">Phosphoramidate-3'-OMe-Uridine</p> |  <p data-bbox="1060 1409 1458 1461">3'-OMe-Uridine-5'-Triphosphate<br/>(3'-OMe-UTP)</p>    |

**Fig. S1. Structures of nucleoside analogues, example prodrugs and active triphosphate forms.** The nucleosides 2'-OMe-Uridine, 2'-F-2'-Deoxyuridine and 3'-OMe-Uridine (left), example prodrug forms (middle) and their active triphosphate forms (right).

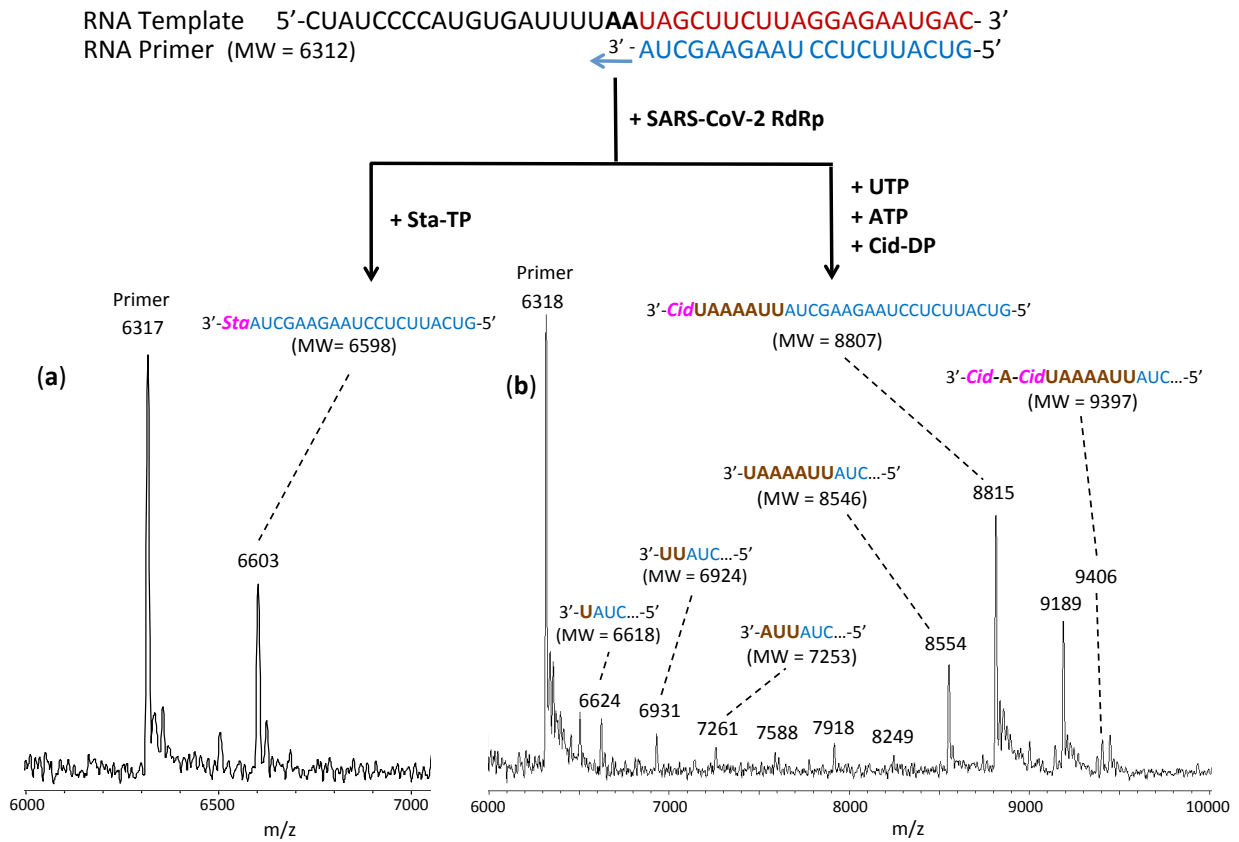

**Fig. S2. Incorporation of Sta-TP and Cid-DP by SARS-CoV-2 RdRp to terminate the polymerase reaction.** The sequences of the primer and template used for this extension reaction are shown at the top of the figure. Polymerase extension reactions were performed by incubating Sta-TP (50  $\mu$ M) (a) and Cid-DP (50  $\mu$ M), UTP and ATP (b) with pre-assembled SARS-CoV-2 polymerase (nsp12, nsp7 and nsp8), the indicated RNA template and primer and the appropriate reaction buffer, followed by detection of reaction products by MALDI-TOF MS. The progression of each nucleotide incorporation event was observable in (b). The peak at 9189 probably corresponds to the disodium adduct of the RNA extension product Primer-UUAAAAUCidA (9184 Da expected). The detailed procedure is shown in the Materials and Methods section. The accuracy for m/z determination is  $\pm 10$  Da.

RNA Template 5'-CUAUCCTCAUGUGAUUUUAAUAGCUUCUJAGGAGAAUGAC- 3'  
 RNA Primer (MW = 6312) 3'-AUCGAAGAAU CCUCUACUG-5'

+ SARS-CoV RdRp  
 + UTP  
 + ATP  
 + Cid-DP

3'-CidUAAAAUUAUCGAAGAAUCCUCUACUG-5'

(MW = 8807)

3'-Cid-A-CidUAAAAUUAUC...-5'  
 (MW = 9397)

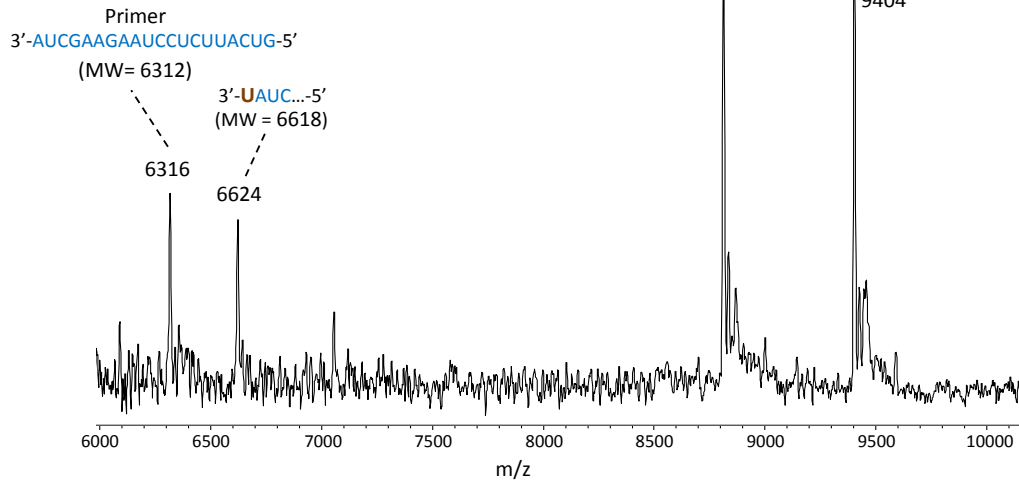

**Fig. S3. Incorporation of Cid-DP by SARS-CoV RdRp to achieve delayed termination of the polymerase reaction.** The sequences of the primer and template used for this extension reaction are shown at the top of the figure. The polymerase extension reaction was performed by incubating Cid-DP, UTP and ATP with pre-assembled SARS-CoV polymerase (nsp12, nsp7 and nsp8), the indicated RNA template and primer and the appropriate reaction buffer, followed by detection of reaction products by MALDI-TOF MS. The accuracy for m/z determination is  $\pm 10$  Da.

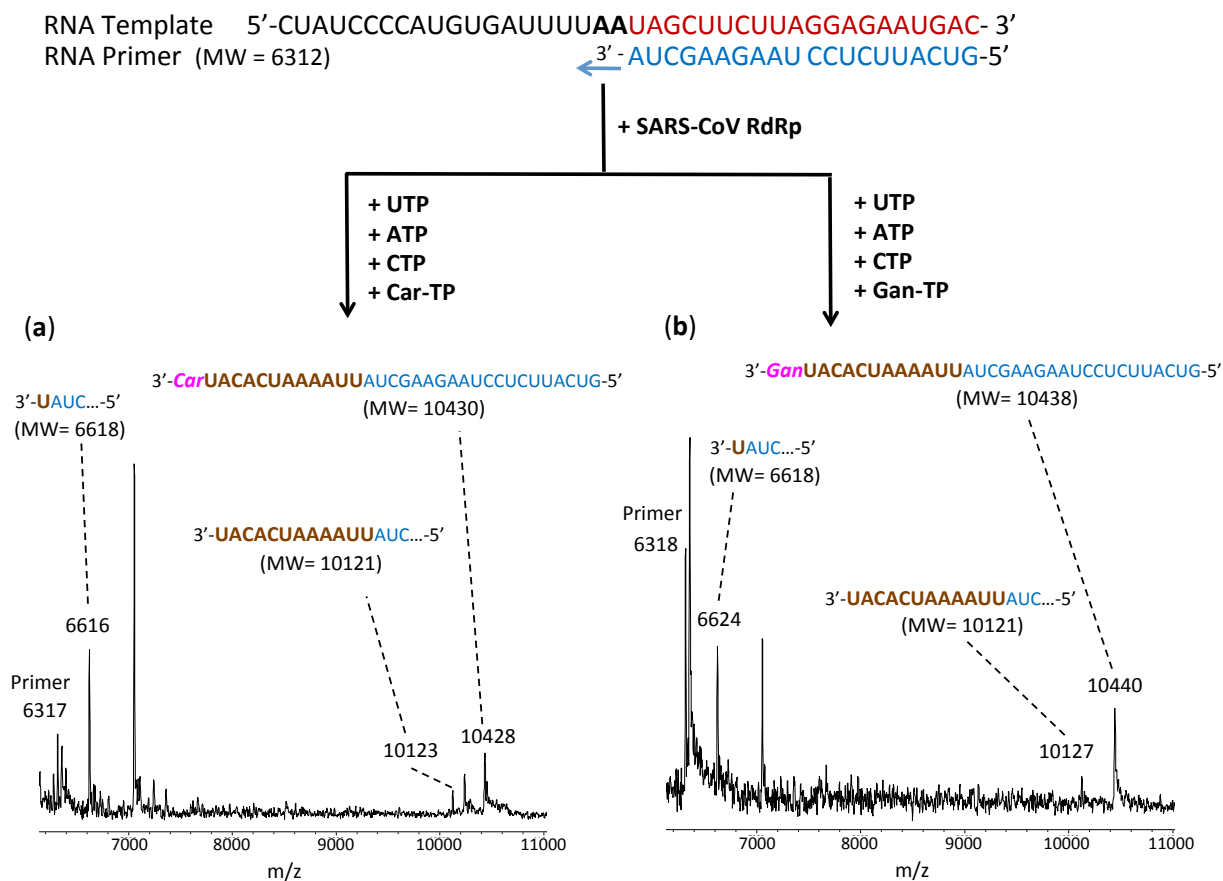

**Fig. S4. Incorporation of Car-TP and Gan-TP by SARS-CoV RdRp to terminate the polymerase reaction.** The sequences of the primer and template used for this extension reaction are shown at the top of the figure. Polymerase extension reactions were performed by incubating Car-TP, UTP, ATP and CTP (a) and Gan-TP, UTP, ATP and CTP (b) with pre-assembled SARS-CoV polymerase (nsp12, nsp7 and nsp8), the indicated RNA template and primer and the appropriate reaction buffer, followed by detection of reaction products by MALDI-TOF MS. The accuracy for m/z determination is  $\pm 10$  Da.

RNA Template 5'-CUAUCCTCAUGUGAUUUUAAUAGCUUCUJAGGAGAAUGAC-3'  
 RNA Primer (MW = 6312) 3'-AUCGAAGAAU CCUCUACUG-5'

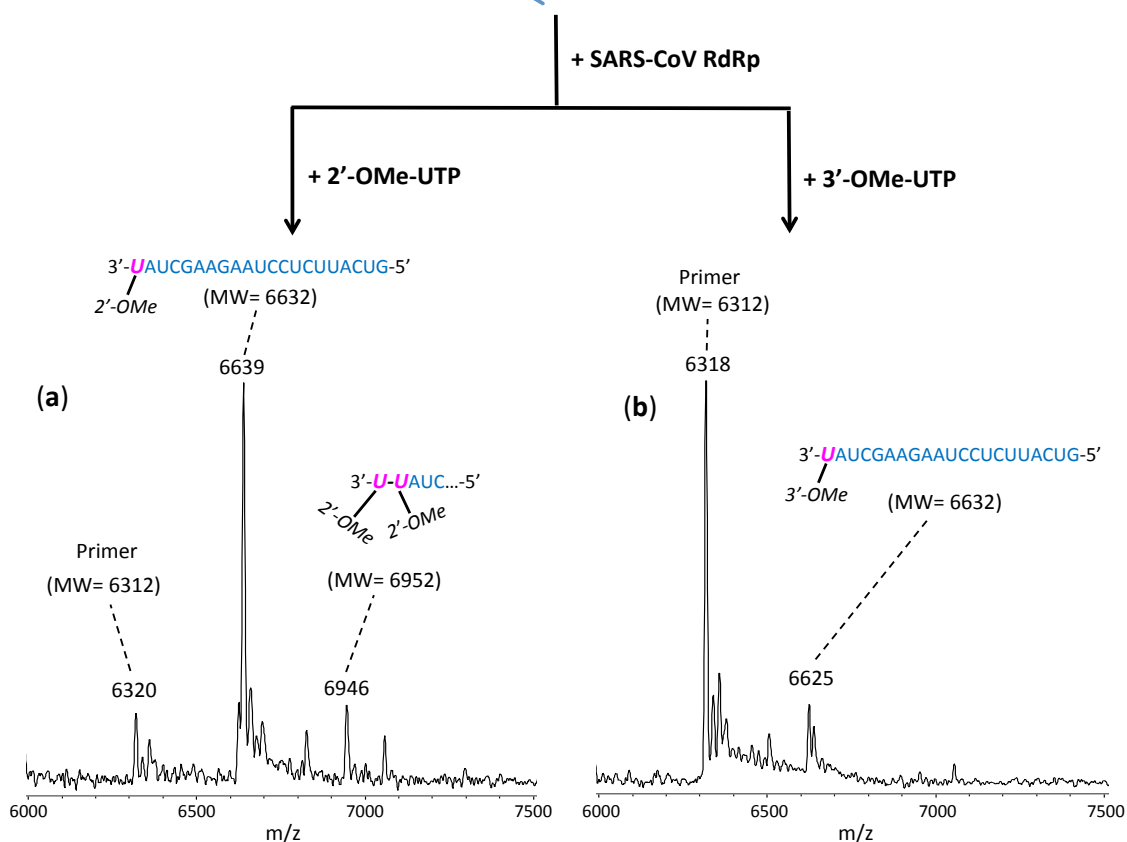

**Fig. S5. Incorporation of 2'-OMe-UTP and 3'-OMe-UTP by SARS-CoV RdRp to terminate the polymerase reaction.** The sequences of the primer and template used for this extension reaction are shown at the top of the figure. Polymerase extension reactions were performed by incubating 2'-OMe-UTP (a) and 3'-OMe-UTP (b) with pre-assembled SARS-CoV polymerase (nsp12, nsp7 and nsp8), the indicated RNA template and primer and the appropriate reaction buffer, followed by detection of reaction products by MALDI-TOF MS. The accuracy for m/z determination is  $\pm 10$  Da.

RNA Template 5'-CUAUCCTCAUGUGAUUUUAAUAGCUUCUJAGGAGAAUGAC-3'  
 RNA Primer (MW = 6312) 3'-AUCGAAGAAU CCUCUACUG-5'

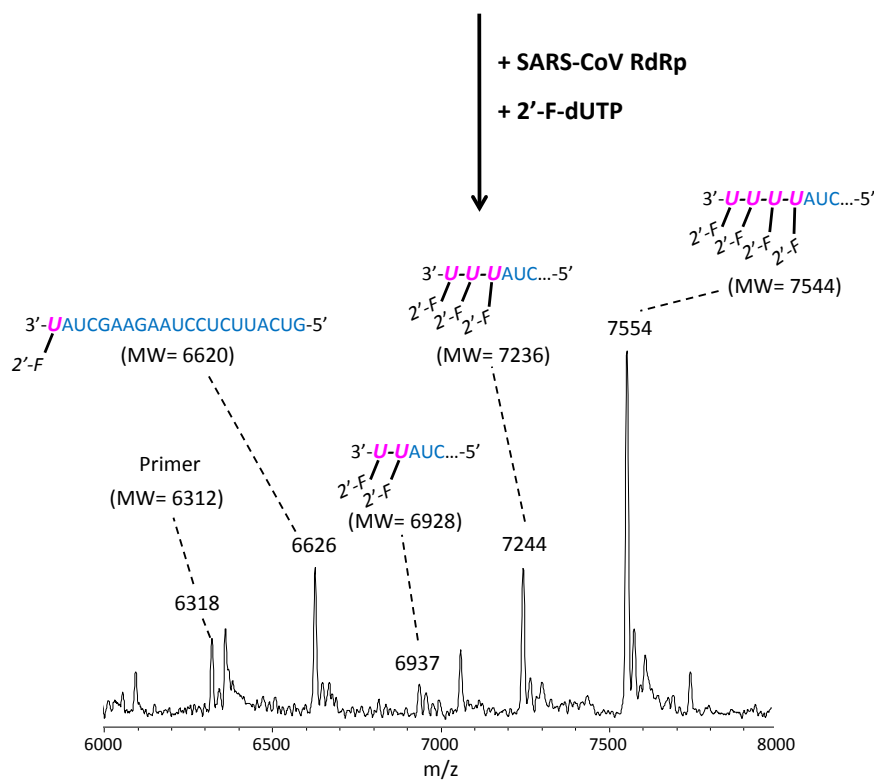

**Fig. S6. Incorporation of 2'-F-dUTP by SARS-CoV RdRp catalyzed reaction.** The sequences of the primer and template used for this extension reaction are shown at the top of the figure. The polymerase extension reaction was performed by incubating 2'-F-dUTP with pre-assembled SARS-CoV polymerase (nsp12, nsp7 and nsp8), the indicated RNA template and primer and the appropriate reaction buffer, followed by detection of reaction products by MALDI-TOF MS. The accuracy for m/z determination is  $\pm 10$  Da.

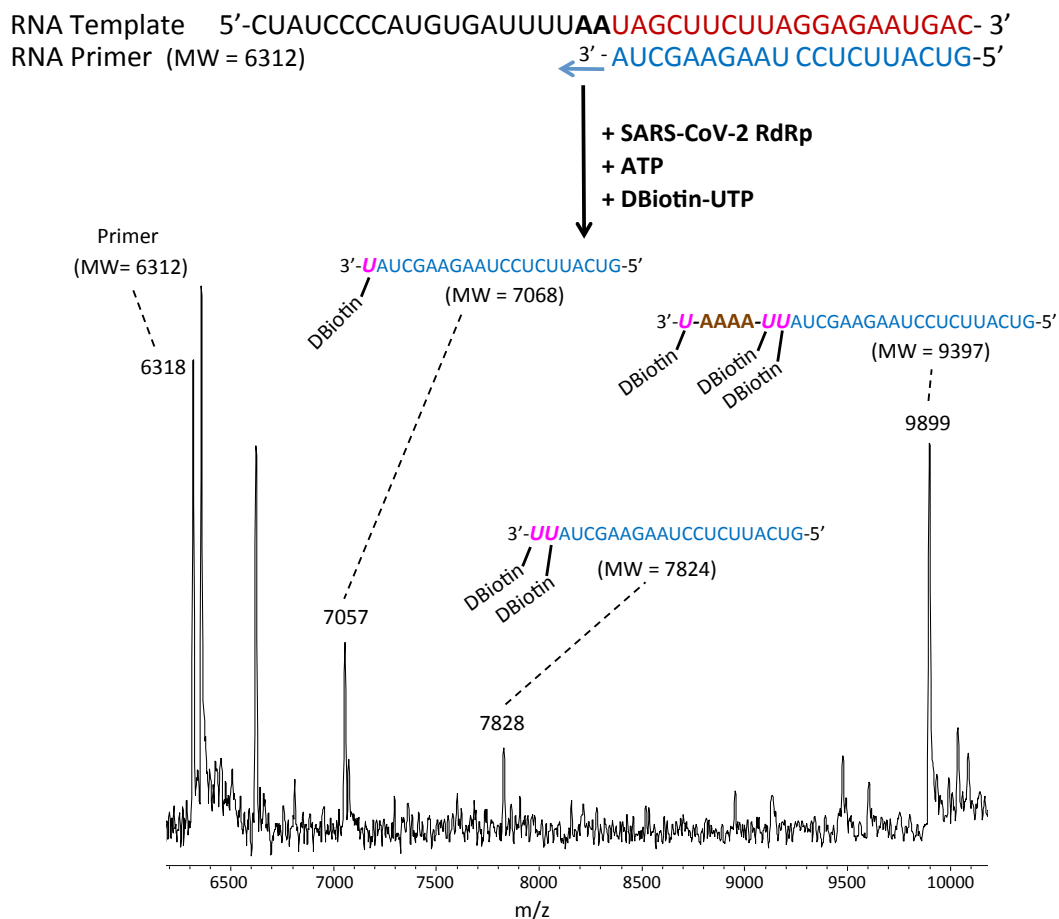

**Fig. S7. Incorporation of desthiobiotin-16-UTP by SARS-CoV-2 RdRp catalyzed reaction.** The sequences of the primer and template used for this extension reaction are shown at the top of the figure. The polymerase extension reaction was performed by incubating desthiobiotin-16-UTP and ATP with pre-assembled SARS-CoV-2 polymerase (nsp12, nsp7 and nsp8), the indicated RNA template and primer and the appropriate reaction buffer, followed by detection of reaction products by MALDI-TOF MS. The accuracy for m/z determination is  $\pm 10$  Da. Desthiobiotin is abbreviated DBiotin in the figure.



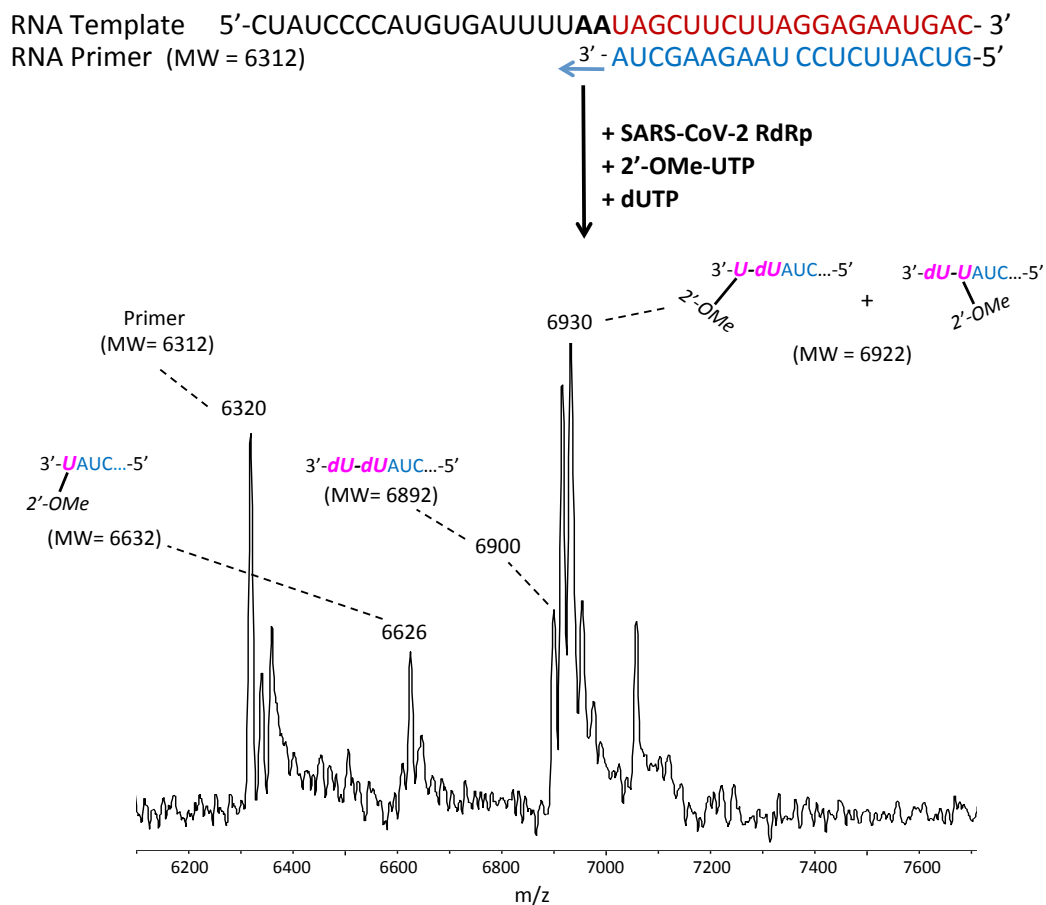

**Fig. S8. Incorporation of 2'-OMe-UTP and dUTP by SARS-CoV-2 RdRp catalyzed reaction.** The sequences of the primer and template used for this extension reaction are shown at the top of the figure. The polymerase extension reaction was performed by incubating 2'-OMe-UTP and dUTP with pre-assembled SARS-CoV-2 polymerase (nsp12, nsp7 and nsp8), the indicated RNA template and primer and the appropriate reaction buffer, followed by detection of reaction products by MALDI-TOF MS. The accuracy for m/z determination is  $\pm 10$  Da.

RNA Template 5'-CUAUCCCCAUGUGAUUUUAAUAGCUUCUUAGGAGAAUGAC-3'  
 RNA Primer (MW = 6312) 3'-AUCGAAGAAU CCUCUUACUG-5'

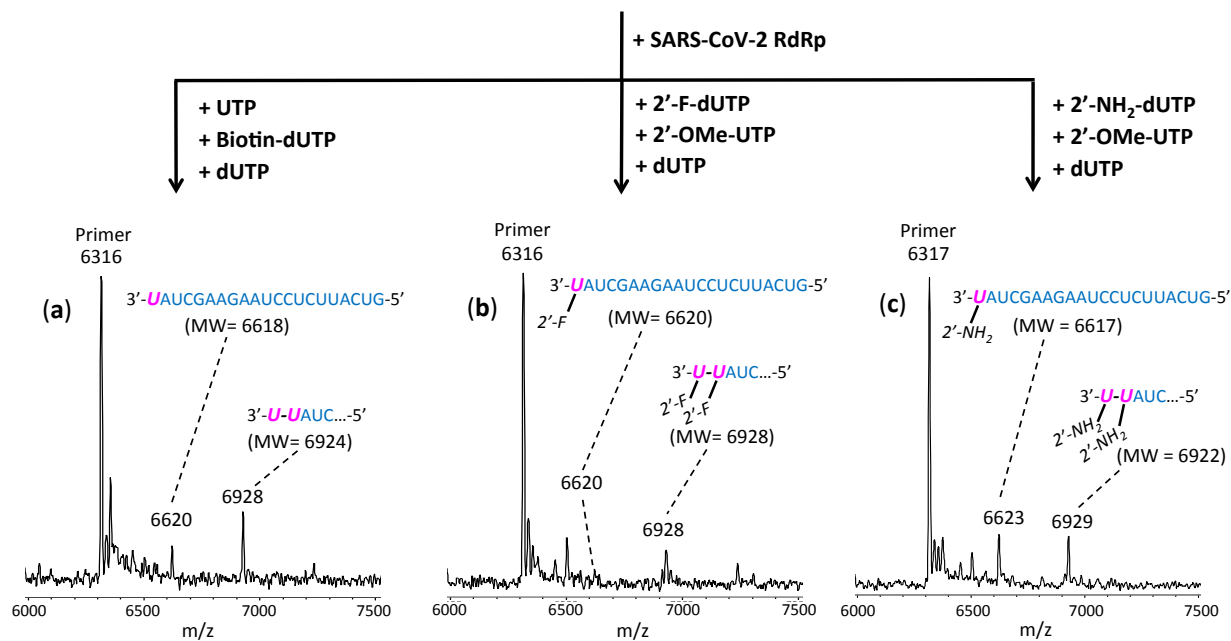

**Fig. S9. Comparison of Relative Incorporation of UTP, Biotin-dUTP, dUTP; 2'-F-dUTP, 2'-OMe-UTP, dUTP; and 2'-NH<sub>2</sub>-dUTP, 2'-OMe-UTP, dUTP by SARS-CoV-2 RdRp.** The sequences of the primer and template used for this extension reaction are shown at the top of the figure. Polymerase extension reactions were performed by incubating UTP, Biotin-dUTP and dUTP (a), 2'-F-dUTP, 2'-OMe-UTP and dUTP (b) and 2'-NH<sub>2</sub>-dUTP, 2'-OMe-UTP and dUTP (c) with pre-assembled SARS-CoV-2 polymerase (nsp12, nsp7 and nsp8), the indicated RNA template and primer and the appropriate reaction buffer, followed by detection of reaction products by MALDI-TOF MS. The accuracy for m/z determination is  $\pm 10$  Da.
